# Supplementary material for: Regulation of CCL2 by EZH2 affects tumor-associated macrophages polarization and infiltration in breast cancer
Source: PubMed Central journal article supplement (PMC9424193; doi:10.1038/s41419-022-05169-x), 2022-08-29
Supplement: 41419_2022_5169_MOESM2_ESM.pdf [file 41419_2022_5169_MOESM2_ESM.pdf]

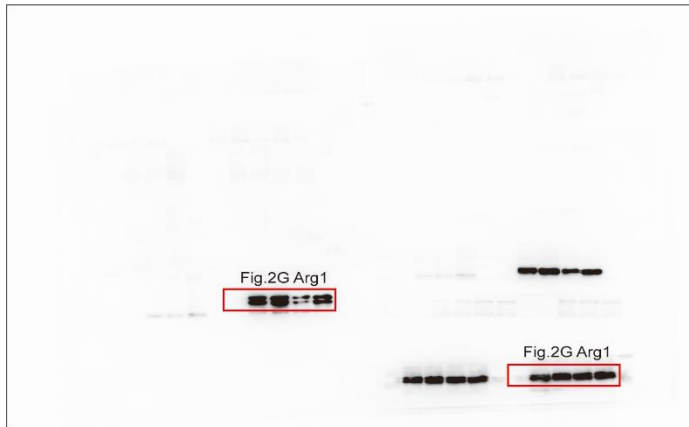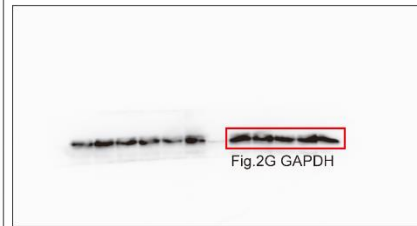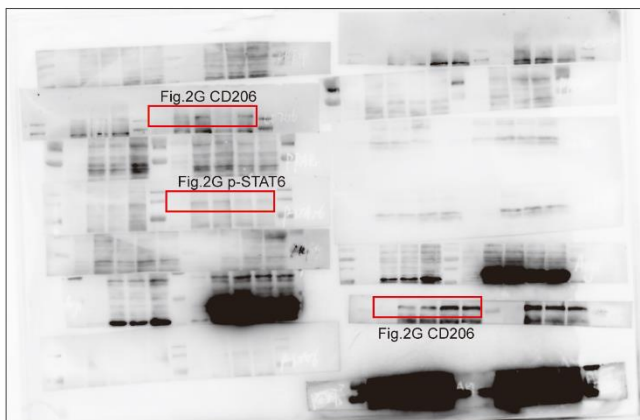

**Supplemental Material 1. Full length uncropped original western blots in Figure 2**

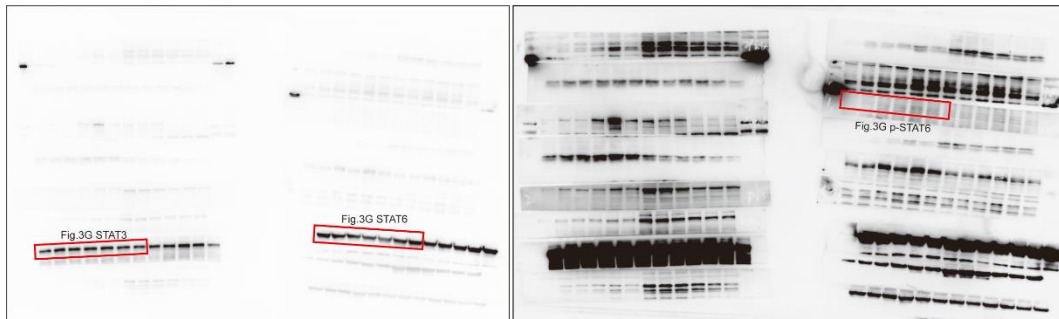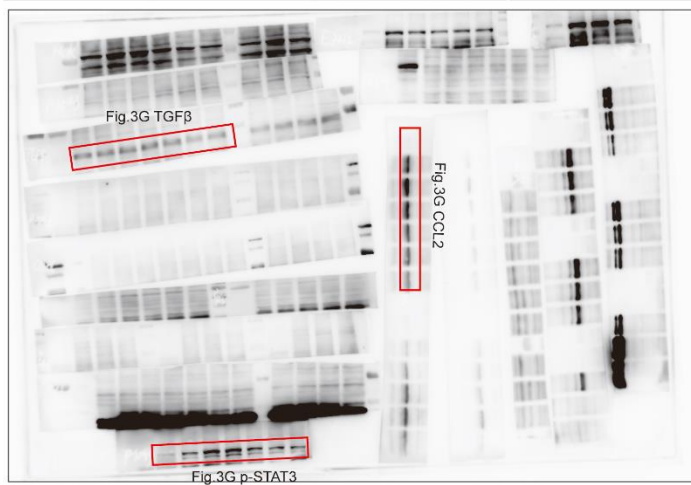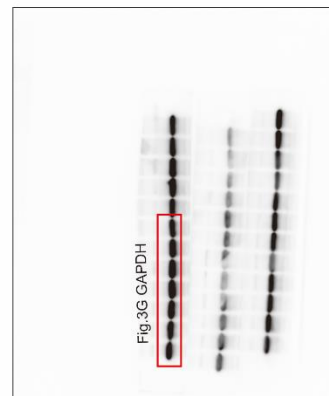

**Supplemental Material 2. Full length uncropped original western blots in Figure 3**

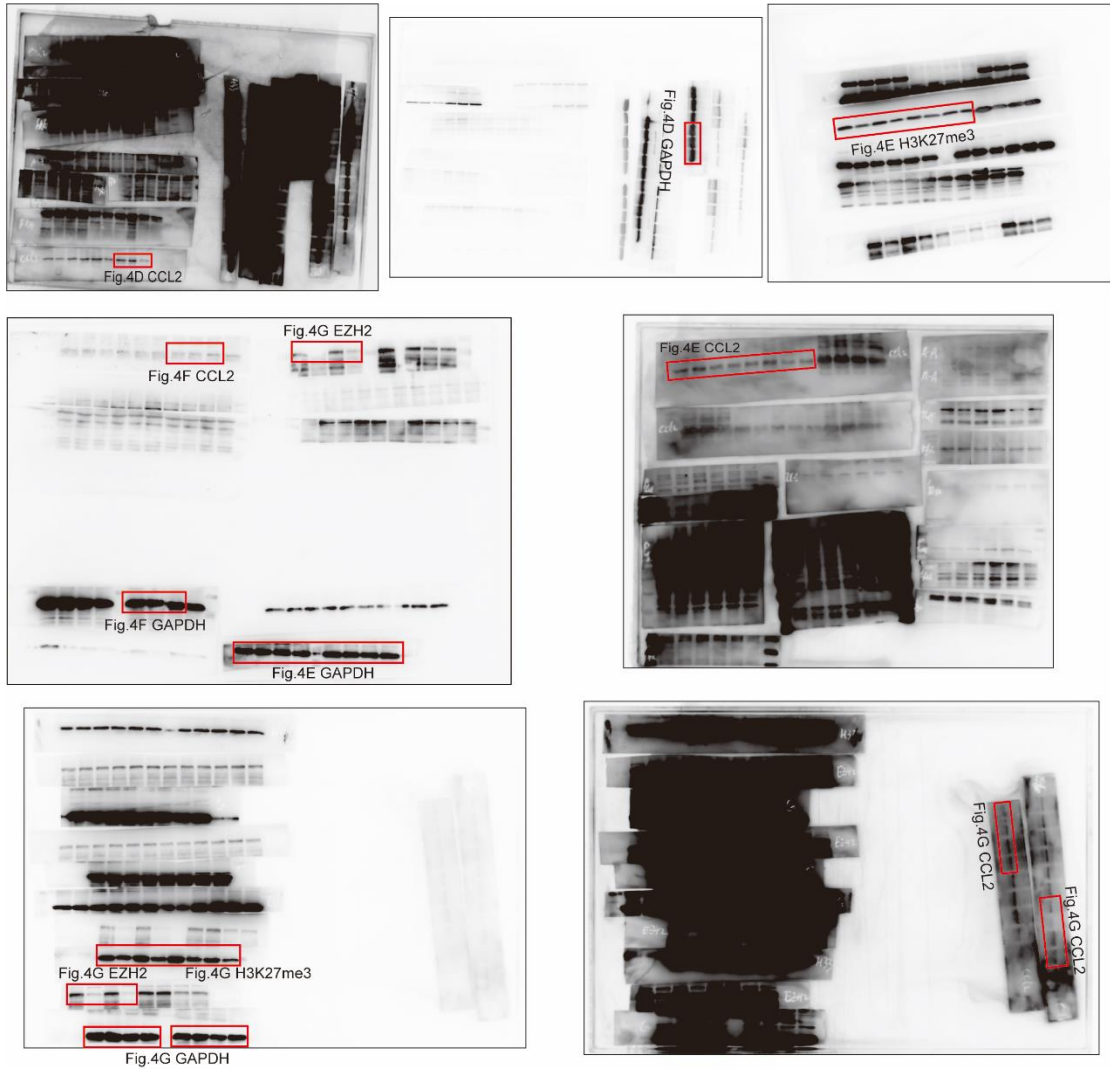

**Supplemental Material 3. Full length uncropped original western blots in Figure 4**

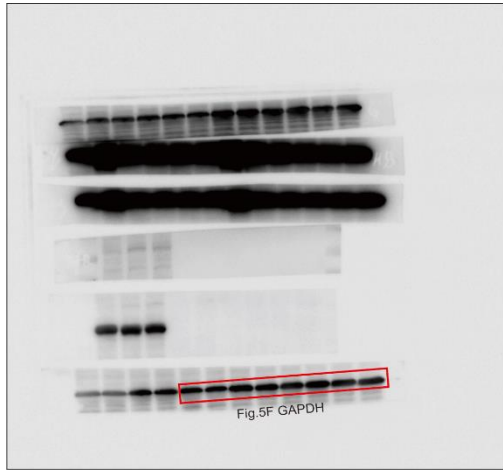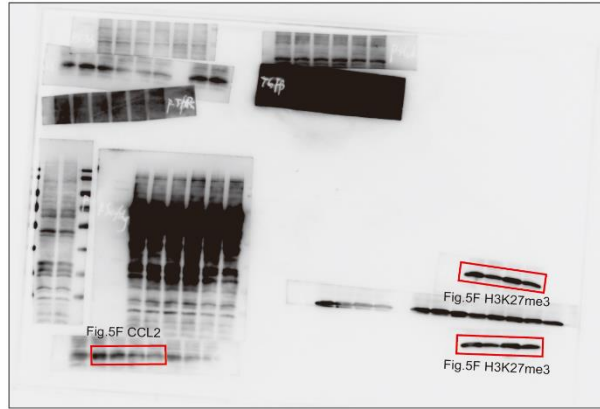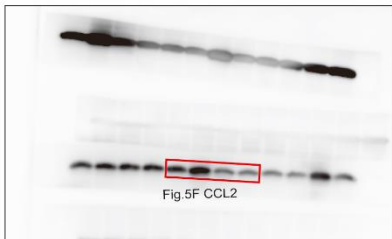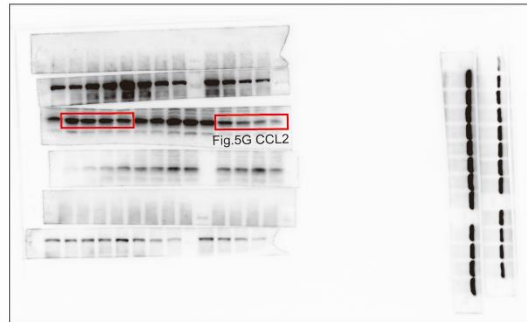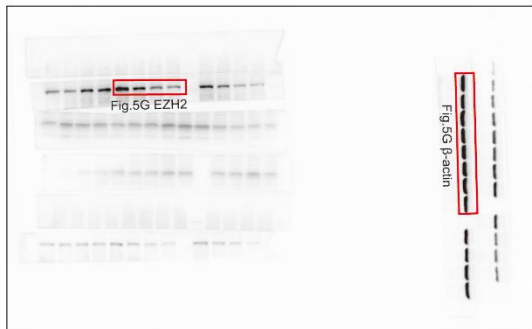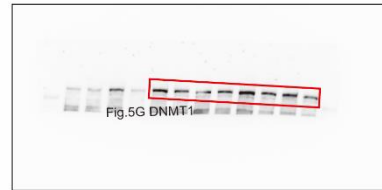

Supplemental Material 4. Full length uncropped original western blots in Figure 5

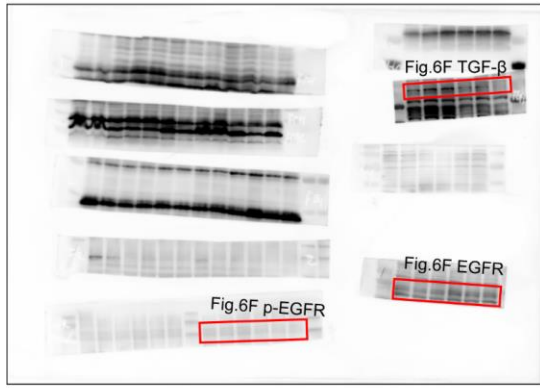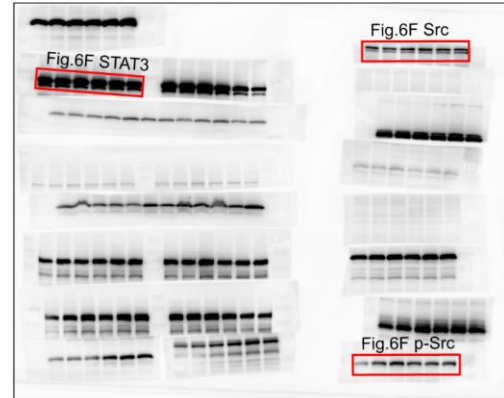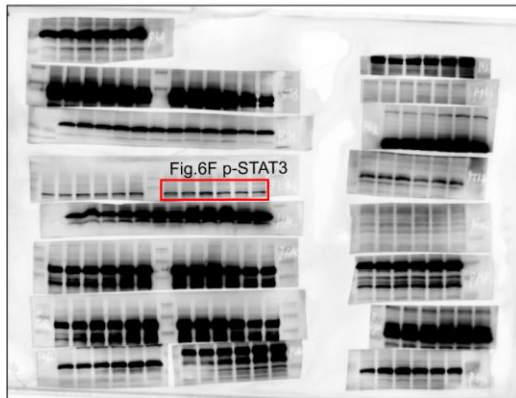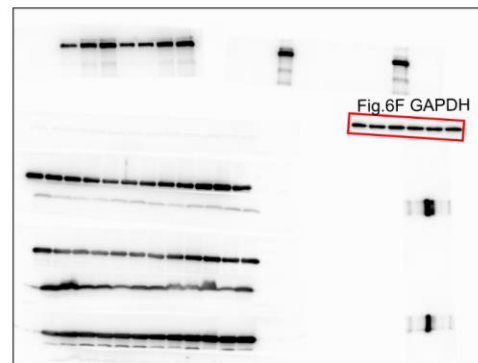

Supplemental Material 5. Full length uncropped original western blots in Figure 6
